# Supplementary material
Source: publisher figshare collection journal article supplement (https://sage.figshare.com/ndownloader/files/18027935)
Supplement: Supplementary file 1 [file 18027935]

**Coding book for data file (see on-line Stata file or compressed Excel file for download)**

| **ID** | **Code** | **Explanation** |  |
| --- | --- | --- | --- |
| 1 | full_article_citation | APA reference |  |
| 2 | year | Year of publication |  |
| 3 | Journal | (1) The Leadership Quarterly (2) Journal of Operations Management (3) Personnel Psychology (4) Journal of Organizational Behavior (5) Journal of Applied Psychology (6) Journal of Management (7) Academy of Management (8) Strategic Management Journal (9) Organization Science |  |
| 4 | topic | Topic of study, broadly defined Use of keyword identified by authors |  |
| 5 | micro/macro | (1) Micro (2) Macro |  |
| 6 | type_panel | (1) Longitudinal (2) Hiearchical (3) Both longitudinal and hierarchical |  |
| 7 | explanation_type | Text to explain the type of panel data |  |
| 8 | n_lower_level | Sample size at lowest level (i.e., biggest sample size or sample size at Level-1) N/R: not reported |  |
| 9 | n_higher_level | Sample size at higher level (i.e., sample size at Level-2) N/R: not reported |  |
| 10 | n_third_level | If 3-level data, sample size at Level-3  N/A: not applicable N/R: not reported |  |
| 11 | data_form | (1) Wide (2) Long (assumed) |  |
| 12 | dummies | (0) Dummy not included (1) Dummy for lowest level fixed effects included (2) Dummy for lowest level fixed effects not included, but dummies included at a higher level |  |
| 13 | cluster_means | (0) Cluster means not included & not reported (1) All relevant cluster means included (2) Some but not all relevant cluster means included |  |
| 14 | type_modeling | Text to include type of modeling reported by authors |  |
| 15 | estimator | (1) GLS random-effects (2) GLS fixed-effects  (3) ML random-effects & Restricted ML (REML) random effects or quasi-ml (4) ML estimator (5) OLS/2SLS/3SLS (6) GEE (7) GMM (8) Others & Unclear (9) not reported (10) ML, within (e.g., estimated a between and a within model for the same variable). |  |
| 16 | program | (1) Stata (2) HLM (3) SPSS (4) R (5) Mplus (6) SAS (7) Others (8) AMOS (9) not reported |  |
| 17 | command | Command used N/R: not reported |  |
| 18 | exogeneity_level1 | (0) Level1 predictor is probably endogenous (1) Level1 predictor is manipulated, fixed, cyclical or vary randomly in nature (2) Level1 predictor is endogenous but instrumented |  |
| 19 | exogeneity_level2 | (0) Level2 predictor is probably endogenous (1) Level2 predictor is manipulated, fixed, cyclical or vary randomly in nature (2) Level2 predictor is endogenous but instrumented (4) no Level2 predictor |  |
| 20 | centering_l1 | (0) No centering reported (1) Grand-mean centering (or "mean-center") reported (2) Group-mean centering reported (3) Others or unclear  (4) Not applicable (5) Standardizing | For at least one variable |
| 21 | centering_l2 | (0) No centering reported (1) Grand-mean centering (or "mean-center") reported (2) Group-mean centering reported (3) Others or unclear (4) Not applicable (e.g., no L2 variable) (5) Standardizing |  |
| 22 | interest | (1) Interest in L1 effect (2) Interest in L2 effect (3) Interest in L1/L2 effects (4) Interest in cross-level interactions & L1/L2 effect |  |
| 23 | test_random | (0) no (1) yes (2) Comparison with FE/RE estimates but no test (9) N/A |  |
| 24 | test_random_effects | (0) No test (1) Hausman test (2) LR test (3) F-test (4) Other (e.g., comparison with other estimation procedures but no test performed) (9) N/A |  |
| 25 | result_RE_assumption | (0) No test performed (1) RE assumption holds (2) RE assumption does not hold, need to use a FE (9) N/A |  |
| 26 | re_assumption_holds | (0) No RE estimator (dummy, fixed effects, cluster means, cluster centering, gls fe, L1 predictors exogenous) (1) RE has been demonstrated empirically to hold (2) RE assumption made and not justified (3) Unable to determine |  |
| 28 | standard_error | (1) default option (i.e., nothing reported about the estimation of standard errors) (2) Heteroscedasticity robust SE (3) Cluster robust SE (4) Bootstrapping (5) Other |  |
| 29 | treatment_time | (1) Not applicable (2) Ignored (3) Time dummies |  |
| 30 | causal_claims | (1) Authors make causal claims (2) Not clear (3) Authors refrain from making causal claims (recognize correlation) (4) Authors make causal claims but somehow acknowledge the problem in the limitation |  |
